# Supplementary material
Source: MDPI journal article supplement (https://www.mdpi.com/2227-9040/11/3/190)
Supplement: s1 [file s1]

# Surface-Enhanced Raman Spectroscopic Analysis of Flavoenzyme Cofactors: Guidance for Flavin-Related Bio- and Chemo- Sensors

Yawen Liu, Hao Ma, Junqi Zhao, Jihong Wang, Xiaoxia Han and Bing Zhao \*

State Key Laboratory of Supramolecular Structure and Materials, College of Chemistry, Jilin University, Changchun 130012, China

\* Correspondence: zhaob@jlu.edu.cn

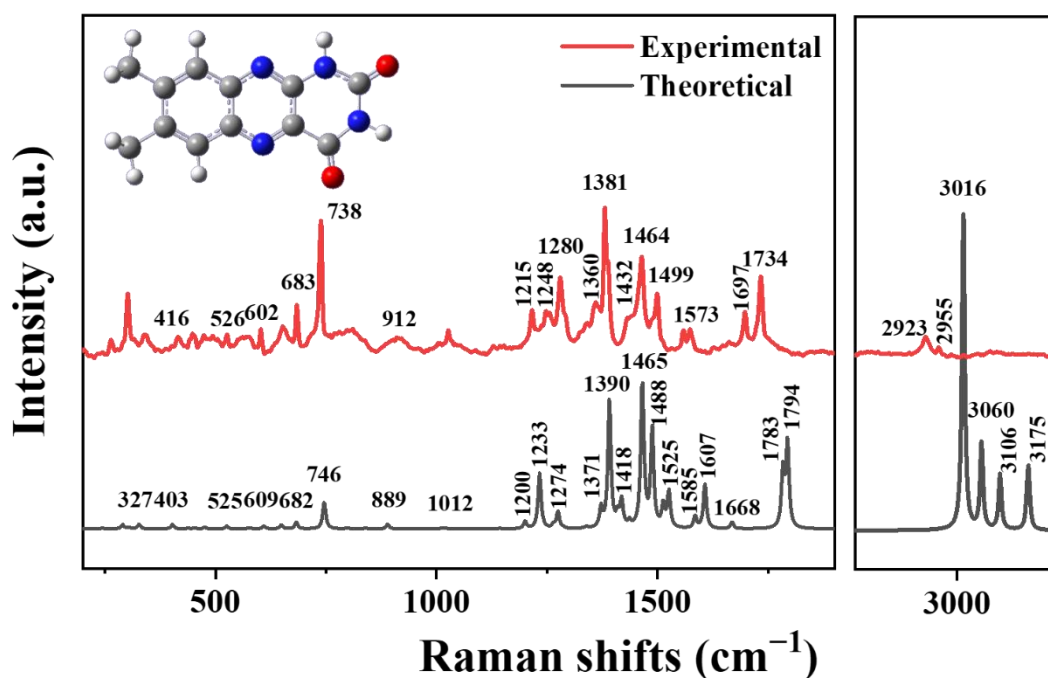

**Figure S1.** The comparison of the calculated Raman spectrum(black) and the experimental solid Raman spectrum(red) of lumichrome.

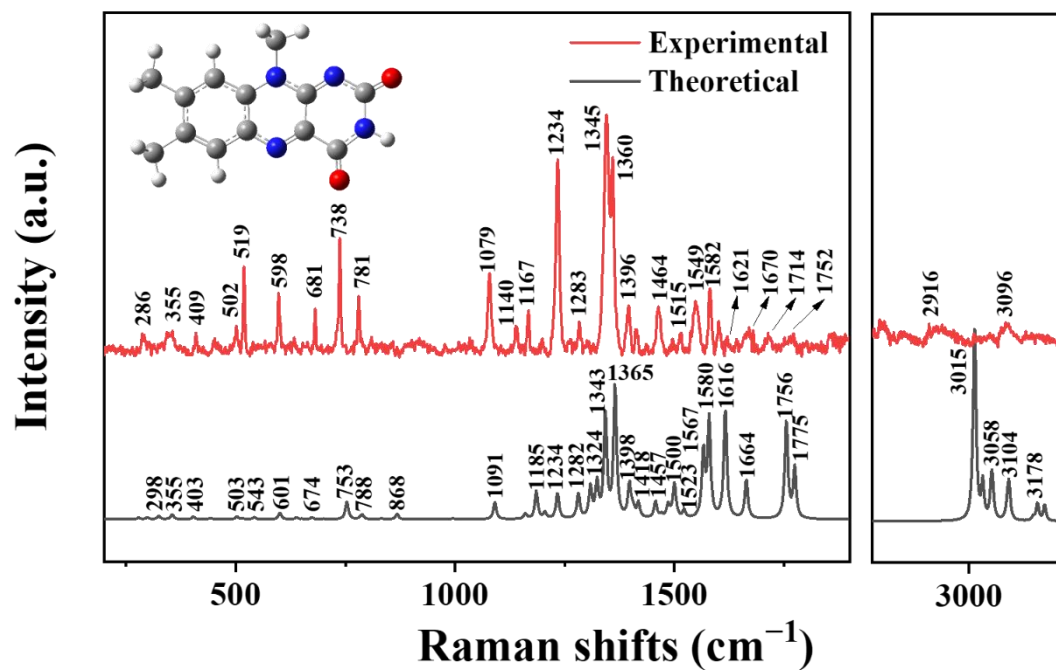

**Figure S2.** The comparison of the calculated Raman spectrum (black) and the experimental solid Raman spectrum (red) of lumiflavin.

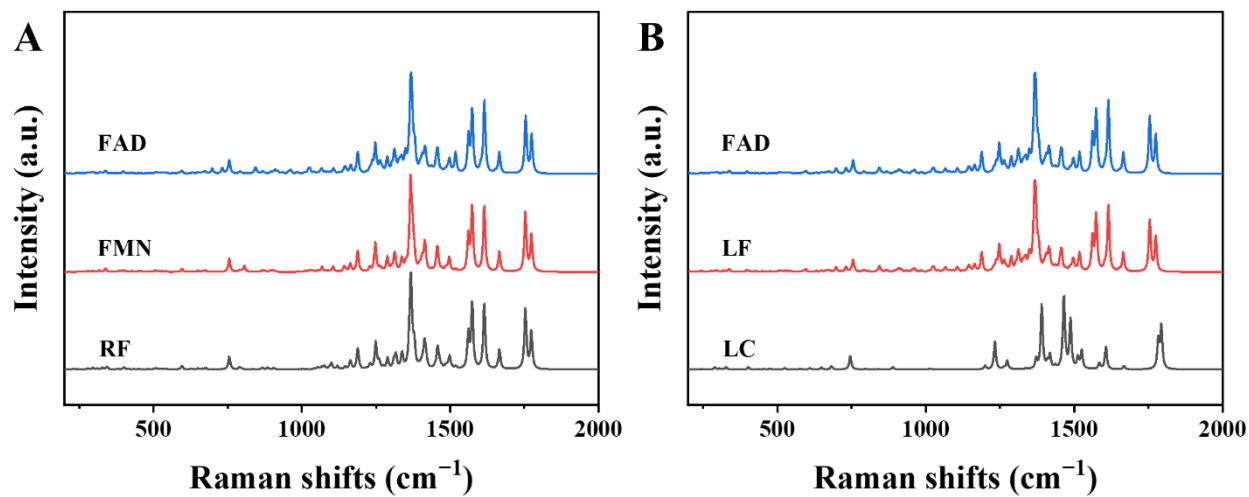

**Figure S3.** (A) The comparison of calculated Raman spectra of RF, FMN and FAD. (B) The comparison of calculated Raman spectra of LC, LF and FAD.

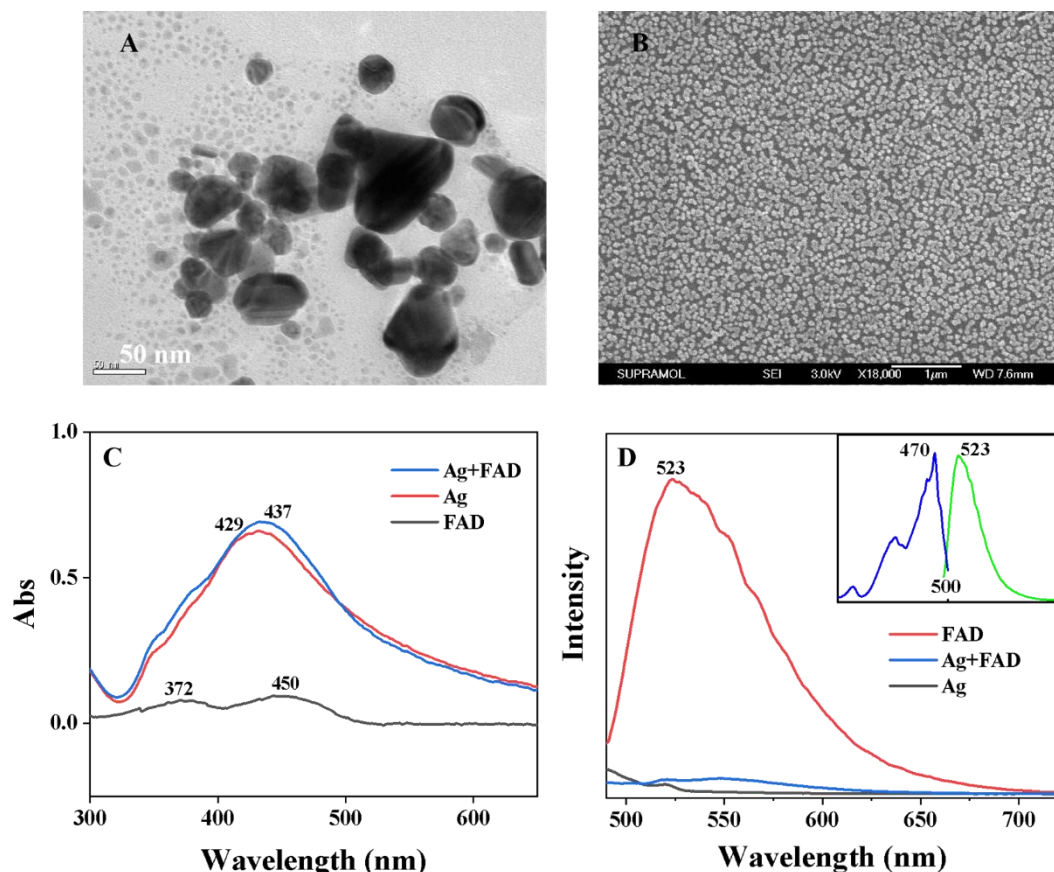

**Figure S4.** (A) TEM image of Ag nanoparticles; (B) SEM image of the self-assembled silver film; (C) UV spectra of Ag colloid, FAD and mixture of Ag colloid and FAD. The prepared Ag sol was mixed with  $10^{-4}$  M of FAD at a volume ratio of 9:1, followed by 5-fold dilution. Next, the UV spectra were characterized and compared with the UV spectra of the diluted Ag sol and FAD mix.; (D) Fluorescence emission spectra of Ag colloid, FAD and mixture of Ag colloid and FAD at 470 nm excitation. The concentration of FAD for fluorescence detection was equal to that of the mixture of Ag colloid and FAD with a volume ratio of 9:1 at  $10^{-5}$  M.

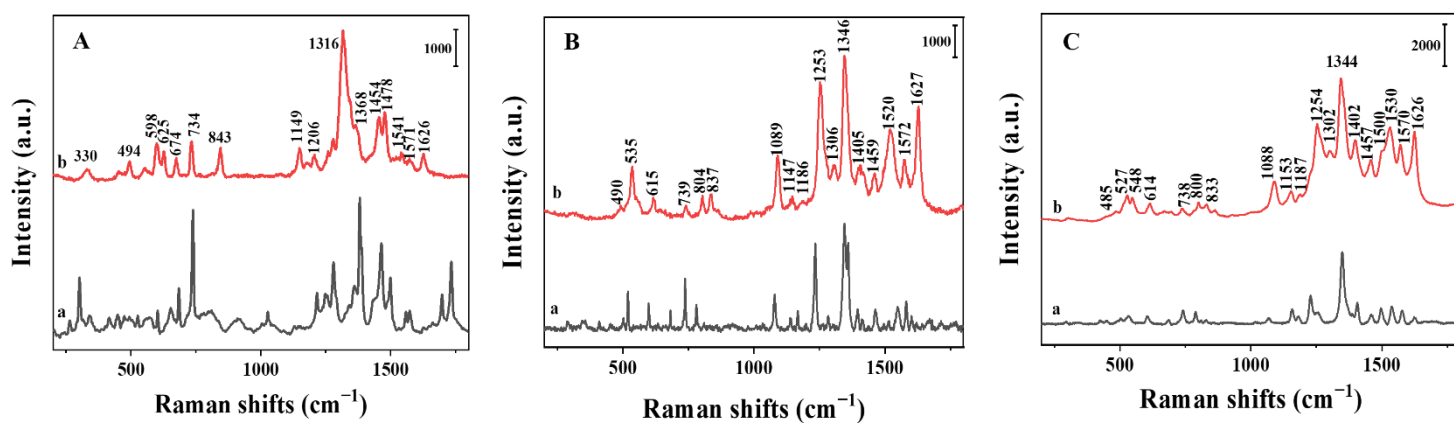

**Figure S5.** Normal Raman (a) and SERS (b) spectra of LC (A), LF (B) and FAD (C).

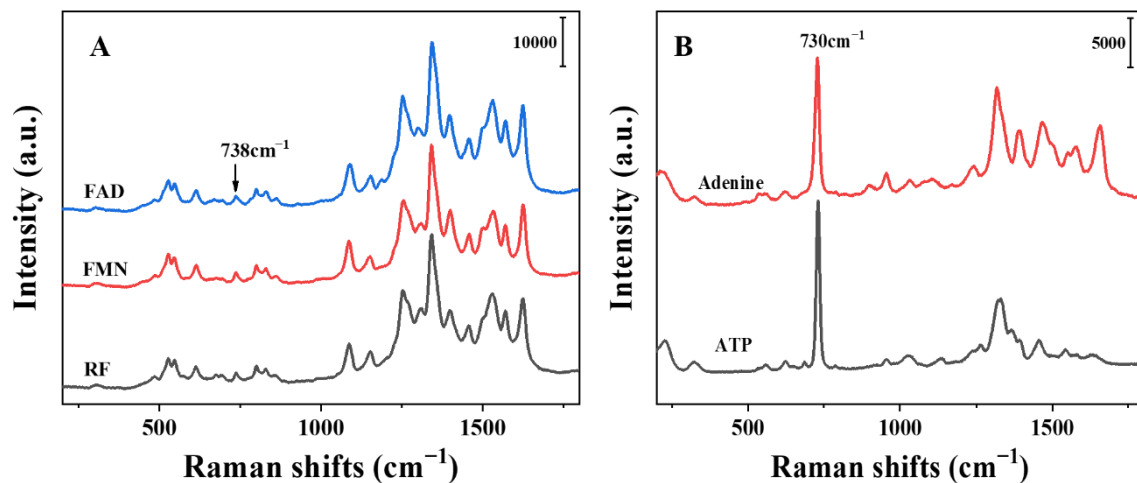

Figure S6. SERS spectra of  $10^{-5}$  M RF, FMN, FAD, adenine and ATP on Ag film at 532 nm laser.

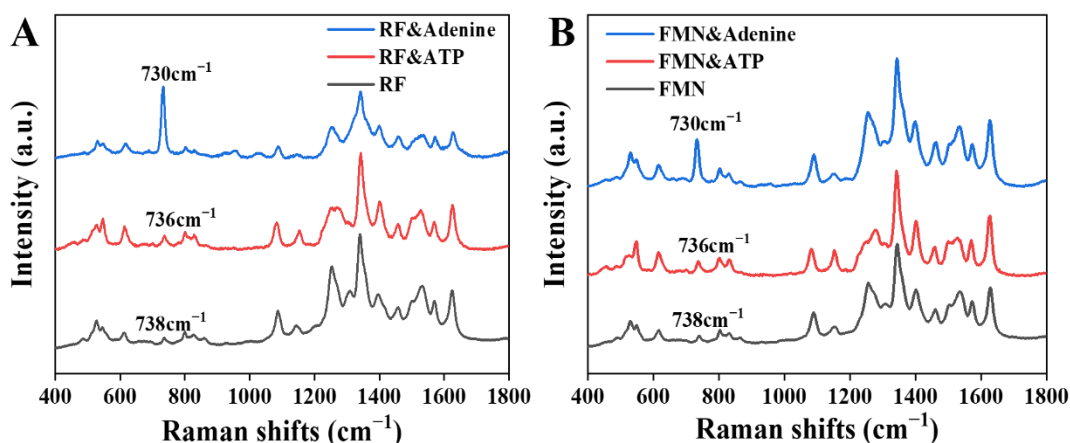

Figure S7. 532 nm laser Raman spectra of RF(A) and FMN (B), mixed with the same concentration of adenine or ATP.

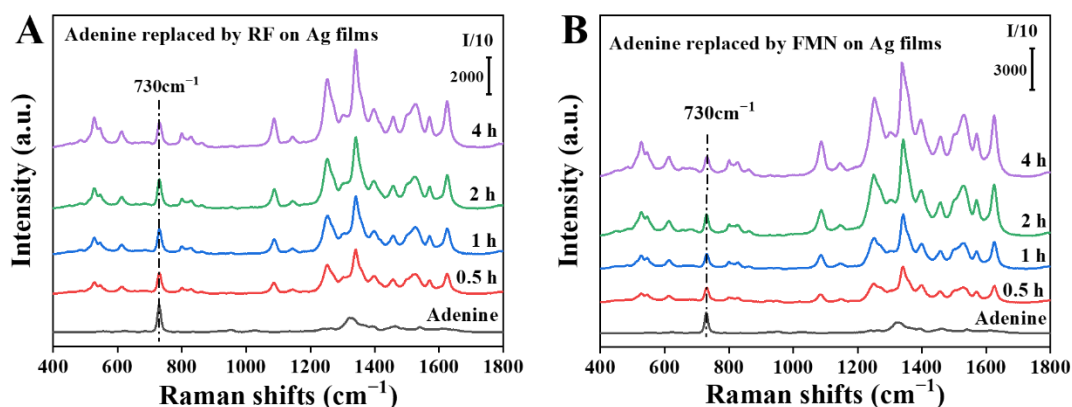

Figure S8. 532 nm laser Raman spectra of adenine replaced by RF (A) and FMN (B) on Ag films, respectively.

**Table S1.** Band assignments of Raman and SERS spectra from DFT calculation and experimental results of LC.

| Calculation<br>(cm <sup>-1</sup> ) | Raman (cm <sup>-1</sup> ) | SERS<br>(cm <sup>-1</sup> ) | Assignments                                                                                                                                                                                        |
|------------------------------------|---------------------------|-----------------------------|----------------------------------------------------------------------------------------------------------------------------------------------------------------------------------------------------|
| 327                                | 339                       | 330                         | C <sub>6</sub> -C <sub>7</sub> -C <sub>Me</sub> , C <sub>9</sub> -C <sub>8</sub> -C <sub>Me</sub> bending                                                                                          |
| 403                                |                           |                             | N <sub>3</sub> -C <sub>2</sub> =O, N <sub>3</sub> -C <sub>4</sub> =O bending                                                                                                                       |
| 525                                | 526                       | 494                         | C <sub>4a</sub> -C <sub>4</sub> -N <sub>3</sub> , C <sub>10a</sub> -N <sub>1</sub> -C <sub>2</sub> bending                                                                                         |
| 607                                | 602                       | 598                         | Ring I, II bending                                                                                                                                                                                 |
| 649                                | 652                       | 625                         | N <sub>3</sub> -C <sub>2</sub> =O, N <sub>3</sub> -C <sub>4</sub> =O, Ring II bending                                                                                                              |
| 682                                | 683                       | 674                         | C <sub>9a</sub> -C <sub>4a</sub> -N <sub>5</sub> , C <sub>5a</sub> -C <sub>9a</sub> -N <sub>10</sub> , Ring III bending                                                                            |
| 746                                | 738                       | 734                         | C <sub>7</sub> -C <sub>8</sub> , C <sub>5a</sub> -C <sub>9a</sub> stretching, Ring II breath                                                                                                       |
| 889                                |                           | 843                         | C <sub>6</sub> -C <sub>5a</sub> -C <sub>5</sub> , Ring III bending                                                                                                                                 |
| 1012                               | 1026                      | 1149                        | N <sub>1</sub> -C <sub>2</sub> , C <sub>2</sub> -N <sub>3</sub> stretching                                                                                                                         |
| 1200                               |                           |                             | C <sub>8</sub> -C <sub>9</sub> -H, C <sub>7</sub> -C <sub>6</sub> -H bending,<br>C <sub>7</sub> -C <sub>Me</sub> , C <sub>8</sub> -C <sub>Me</sub> stretching                                      |
| 1233                               | 1215                      | 1206                        | N <sub>3</sub> -C <sub>4</sub> , C <sub>5a</sub> -C <sub>6</sub> , C <sub>9a</sub> -N <sub>10</sub> stretching                                                                                     |
| 1264                               | 1248                      |                             | C <sub>5a</sub> -N <sub>5</sub> , C <sub>5a</sub> -C <sub>6</sub> , C <sub>9</sub> -C <sub>9a</sub> , C <sub>9a</sub> -N <sub>10</sub> stretching                                                  |
| 1274                               | 1280                      |                             | C <sub>7</sub> -C <sub>6</sub> -H, C <sub>8</sub> -C <sub>9</sub> -H, C <sub>5a</sub> -N <sub>5</sub> -C <sub>4a</sub> bending                                                                     |
| 1339                               | 1339                      |                             | C-N stretching, C <sub>2</sub> -N <sub>1</sub> -H bending                                                                                                                                          |
| 1371                               | 1360                      |                             | C <sub>4a</sub> -C <sub>10a</sub> , C <sub>5a</sub> -C <sub>9a</sub> , C <sub>7</sub> -C <sub>8</sub> stretching                                                                                   |
| 1390                               | 1381                      | 1316                        | C <sub>5a</sub> -C <sub>6</sub> , N <sub>1</sub> -C <sub>2</sub> , C <sub>2</sub> -N <sub>3</sub> stretching                                                                                       |
| 1418                               |                           |                             | C <sub>2</sub> -N <sub>3</sub> -H bending                                                                                                                                                          |
| 1436                               | 1432                      |                             | C <sub>2</sub> -N <sub>3</sub> -H, C <sub>2</sub> -N <sub>1</sub> -H bending,<br>N <sub>1</sub> -C <sub>10a</sub> , N <sub>10</sub> -C <sub>10a</sub> , C <sub>5</sub> -C <sub>4a</sub> stretching |
| 1465                               | 1464                      | 1454                        | C <sub>6</sub> -C <sub>7</sub> , N <sub>1</sub> -C <sub>10a</sub> stretching                                                                                                                       |
| 1488, 1512, 1525                   | 1499                      |                             | H-C-H(Me) bending                                                                                                                                                                                  |
| 1585                               | 1558                      | 1541                        | C <sub>6</sub> -C <sub>7</sub> , C <sub>8</sub> -C <sub>9</sub> , C <sub>5a</sub> -C <sub>9a</sub> , C <sub>4a</sub> -N <sub>5</sub> stretching                                                    |
| 1607                               | 1573                      | 1571                        | C <sub>6</sub> -C <sub>7</sub> , N <sub>10</sub> -C <sub>10a</sub> stretching                                                                                                                      |
| 1668                               |                           |                             | C <sub>6</sub> -C <sub>7</sub> , C <sub>8</sub> -C <sub>9</sub> stretching                                                                                                                         |
| 1783, 1794                         | 1734                      | 1626                        | C <sub>4</sub> =O, C <sub>2</sub> =O stretching                                                                                                                                                    |
| 3016, 3060                         | 2923, 2955                |                             | C-H stretching                                                                                                                                                                                     |
| 3585                               | 3390                      |                             | N-H stretching                                                                                                                                                                                     |

**Table S2.** Band assignments of Raman and SERS spectra from DFT calculation and experimental results of LF.

| Calculation<br>(cm <sup>-1</sup> ) | Raman<br>(cm <sup>-1</sup> ) | SERS<br>(cm <sup>-1</sup> ) | Assignments                                                     |
|------------------------------------|------------------------------|-----------------------------|-----------------------------------------------------------------|
| 279                                |                              |                             | C9-C8-C8Me, C9-C9a-N10, C4-C4a-N5 bending                       |
| 298                                |                              |                             | C6-C7-C7Me, N5-C5a-C9a bending                                  |
| 325                                | 286                          |                             | C8-C9-C9a, C5a-C6-C7, C9a-N10-C11Me,<br>C2-N1-C10a bending      |
| 355                                | 355                          |                             | C10a-N10-C11Me, C6-C5a-C9a bending                              |
| 403                                | 409                          |                             | C6-C7-C7Me, N3-C4-O, N3-C2-N1,<br>C9a-N10-N10a bending          |
| 503                                | 502                          | 490                         | C5a-C9a-C9, C8-C9-C9a, C9a-C5a-C6 bending                       |
| 516                                | 519                          |                             | C9a-N10-C10a, C4-N3-C2 bending                                  |
| 543                                |                              | 535                         | C9a-N10-C10a, C9-C8-C8Me bending                                |
| 601                                | 598                          |                             | C9a-N10, C5a-C6 stretching,<br>C4-N3-C2 bending                 |
| 638                                |                              |                             | C6-C7-C7Me, C9a-C5a-N5,<br>C9a-N10-C11Me bending, Ring I breath |
| 673                                | 681                          | 615                         | N1-C2-O, N3-C4-O, C9a-C5a-N5 bending                            |
| 753                                | 738                          | 736                         | Ring II, III breath                                             |
| 788                                | 781                          | 804                         | C4a-C10a-N1, C4a-N5-C5a bending,<br>C7-C7Me, C8-C8Me stretching |
| 833                                |                              | 837                         | C4-N3-C2, C9a-N10-C10a, C2-N1-C10a,<br>C9a-C5a-N5 bending       |
| 868                                |                              |                             | Ring III breath, C2-N1 stretching                               |
| 905                                |                              |                             | C7Me-C7-C6-H torsion                                            |
| 995                                |                              |                             | N10-C11Me stretching                                            |
| 1034                               |                              |                             | C11Me-H bending                                                 |
| 1091                               | 1079                         | 1089                        | C5a-N5, C9a-N10, C5a-C6,<br>C10a-N10, C4-C4a stretching         |
| 1160                               | 1140                         | 1147                        | C7-C7Me, C8-C8Me, N10-C11Me stretching                          |
| 1185                               | 1167                         | 1186                        | C9-C9a, C5a-N5 stretching                                       |
| 1234                               | 1234                         | 1253                        | C5a-N5, C7-C7Me, C8-C8Me stretching                             |
| 1282                               | 1283                         |                             | C9-C9a, C5a-N5, C5a-C6-C7 stretching                            |
| 1309                               |                              | 1306                        | C5a-N5, C9-C9a stretching,<br>C9a-C9-H, C4a-N5-C5a bending      |
| 1324                               |                              |                             | C9a-N10, C5a-C6 stretching                                      |
| 1343                               | 1345                         | 1346                        | C10a-N10, C9-C9a stretching                                     |
| 1365                               | 1360                         |                             | C4-N3, C6-C5a-C9a, C10a-N1 stretching                           |
| 1398                               | 1386                         | 1405                        | C6-C7, C10a-N10-C9a, C4-N3 stretching                           |
| 1418                               |                              |                             | C7,8Me-H, C4-N3-H bending                                       |
| 1457                               | 1464                         | 1459                        | C5a-C6-C7, C10a-N1 stretching                                   |
| 1500                               | 1496                         |                             | CMe-H bending, C7-C8-C8Me-H torsion                             |
| 1523                               | 1515                         |                             | C8-C9-H, C7-C6-H, CMe-H bending                                 |
| 1567                               | 1549                         | 1520                        | C4a-N5, C10a-N1, C9-C9a-C5a stretching                          |
| 1580                               | 1582                         | 1572                        | C5a-C9a, C10a-N1, C7-C8 stretching                              |
| 1616                               | 1621                         | 1627                        | C10a-N1, C4a-N5, C5a-C6, C8-C9 stretching                       |
| 1664                               | 1670                         |                             | C6-C7, C9-C9a, C5a-N5-C4a stretching                            |
| 1756, 17775                        | 1714, 1752                   |                             | C2=O, C4=O stretching                                           |
| 3000-3100                          | 2916                         |                             | CMe-H stretching                                                |
| 3178, 3195                         | 3096                         |                             | Cbenzene-H stretching                                           |
